# Supplementary material for: Association Between Alcohol Use Disorders and Outcomes of Patients Hospitalized With Community-Acquired Pneumonia
Source: PubMed Central journal article supplement (PMC6563577; doi:10.1001/jamanetworkopen.2019.5172), 2019-06-07
Supplement: jamanetwopen-2-e195172-s001.pdf [file jamanetwopen-2-e195172-s001.pdf]

## Supplementary Online Content

Gupta NM, Lindenauer PK, Yu P-C, et al. Association between alcohol use disorders and outcomes of patients hospitalized with community-acquired pneumonia. *JAMA Network Open*. 2019;2(6):e195172. doi:10.1001/jamanetworkopen.2019.5172

**eTable 1.** Pneumonia Diagnoses, by *ICD-9-CM* Code

**eTable 2.** *ICD-9-CM* Codes for Alcohol Use Disorders

**eTable 3.** Hospital Characteristics of Patients, by Absence or Presence of Alcohol Use Disorders

**eTable 4.** Pneumonia Etiologies, by Absence or Presence of Alcohol Use Disorder and Alcohol Withdrawal Syndrome

**eFigure.** Inclusion/Exclusion Criteria Considered for Patients Included in the Study

This supplementary material has been provided by the authors to give readers additional information about their work.

**eTable 1.** Pneumonia Diagnoses, by ICD-9-CM Code

| ICD-9-CM Code | Pneumonia diagnosis                                                             | No- AUD (N=132,744) | AUD (N=4,752) | p-value <sup>a</sup> |
|---------------|---------------------------------------------------------------------------------|---------------------|---------------|----------------------|
| 481           | <i>Pneumococcal pneumonia</i> , No. (%)                                         | 3,436(2.6)          | 269(5.7)      | <0.001               |
| 482           | Other bacterial pneumonia, No. (%)                                              | 15,193(11.4)        | 597(12.6)     | 0.018                |
| 482.0         | Pneumonia due to <i>Klebsiella pneumoniae</i> , No. (%)                         | 789(0.59)           | 31(0.65)      | 0.61                 |
| 482.1         | Pneumonia due to <i>Pseudomonas</i> , No. (%)                                   | 2,084(1.6)          | 68(1.4)       | 0.45                 |
| 482.2         | Pneumonia due to <i>Hemophilus influenzae</i> [ <i>H. influenzae</i> ], No. (%) | 740(0.56)           | 33(0.69)      | 0.21                 |
| 482.30        | Pneumonia due to <i>Streptococcus</i> , unspecified, No. (%)                    | 601(0.45)           | 46(0.97)      | <0.001               |
| 482.31        | Pneumonia due to <i>Streptococcus</i> , group A, No. (%)                        | 90(0.07)            | 4(0.08)       | 0.67                 |
| 482.32        | Pneumonia due to <i>Streptococcus</i> , group B, No. (%)                        | 122(0.09)           | 9(0.19)       | 0.032                |
| 482.39        | Pneumonia due to other <i>Streptococcus</i> , No. (%)                           | 217(0.16)           | 17(0.36)      | 0.001                |
| 482.40        | Pneumonia due to <i>Staphylococcus</i> , unspecified, No. (%)                   | 136(0.10)           | 3(0.06)       | 0.40                 |
| 482.41        | Methicillin susceptible pneumonia due to <i>Staphylococcus</i> , No. (%)        | 1,109(0.84)         | 67(1.4)       | <0.001               |
| 482.42        | Methicillin resistant pneumonia due to <i>Staphylococcus</i> , No. (%)          | 3,137(2.4)          | 101(2.1)      | 0.29                 |
| 482.49        | Other <i>Staphylococcus</i> pneumonia, No. (%)                                  | 69(0.05)            | 6(0.13)       | 0.031                |
| 482.81        | Pneumonia due to anaerobes, No. (%)                                             | 66(0.05)            | 6(0.13)       | 0.023                |
| 482.82        | Pneumonia due to <i>Escherichia coli</i> [ <i>E. coli</i> ], No. (%)            | 514(0.39)           | 15(0.32)      | 0.43                 |
| 482.83        | Pneumonia due to other Gram-negative bacteria, No. (%)                          | 2,803(2.1)          | 77(1.6)       | 0.020                |
| 482.84        | Pneumonia due to <i>Legionnaires'</i> disease, No. (%)                          | 487(0.37)           | 46(0.97)      | <0.001               |

|             |                                                                                                                |              |             |        |
|-------------|----------------------------------------------------------------------------------------------------------------|--------------|-------------|--------|
| 482.89      | Pneumonia due to other specified bacteria, No. (%)                                                             | 76(0.06)     | 1(0.02)     | 0.30   |
| 482.9       | Bacterial pneumonia, unspecified, No. (%)                                                                      | 3,083(2.3)   | 98(2.1)     | 0.24   |
| 483.0-483.8 | Pneumonia due to other specified organism, including <i>Mycoplasma pneumoniae</i> , <i>Chlamydia</i> , No. (%) | 871(0.66)    | 51(1.1)     | <0.001 |
| 484.0-484.8 | Pneumonia in infectious diseases classified elsewhere, No. (%)                                                 | 137(0.10)    | 6(0.13)     | 0.63   |
| 485         | Bronchopneumonia, organism unspecified, No. (%)                                                                | 624(0.47)    | 19(0.40)    | 0.49   |
| 486         | Pneumonia, organism unspecified, No. (%)                                                                       | 94,265(71.0) | 2,915(61.3) | <0.001 |
| 507.0       | Pneumonitis due to inhalation of food or vomitus, No. (%)                                                      | 22,351(16.8) | 1,147(24.1) | <0.001 |

<sup>a</sup>All p-values based on Pearson's uncorrected chi-square test.

Abbreviations: AUD, alcohol use disorder

**eTable 2. ICD-9-CM Codes for Alcohol Use Disorders**

| <b>Code</b>                                         | <b>Diagnosis</b>                                                 | <b>Total<br/>(N=4,752)</b> |
|-----------------------------------------------------|------------------------------------------------------------------|----------------------------|
| <b>Codes related to Alcohol Abuse</b>               |                                                                  |                            |
| 303.00                                              | Acute alcoholic intoxication in alcoholism, unspecified, No. (%) | 97(2.0)                    |
| 303.01                                              | Acute alcoholic intoxication in alcoholism, continuous, No. (%)  | 112(2.4)                   |
| 303.02                                              | Acute alcoholic intoxication in alcoholism, episodic, No. (%)    | 4(0.08)                    |
| 303.90                                              | Other and unspecified alcohol dependence, unspecified, No. (%)   | 1,432(30.1)                |
| 303.91                                              | Other and unspecified alcohol dependence, continuous, No. (%)    | 755(15.9)                  |
| 303.92                                              | Other and unspecified alcohol dependence, episodic, No. (%)      | 16(0.34)                   |
| 305.00                                              | Alcohol abuse, unspecified, No. (%)                              | 1,862(39.2)                |
| 305.01                                              | Alcohol abuse, continuous, No. (%)                               | 420(8.8)                   |
| 305.02                                              | Alcohol abuse, episodic, No. (%)                                 | 36(0.76)                   |
| <b>Codes related to Alcohol Withdrawal Syndrome</b> |                                                                  |                            |
| 291.81                                              | Alcohol withdrawal, No. (%)                                      | 629(13.2)                  |
| 291.82                                              | Alcohol induced sleep disorders, No. (%)                         | 0(0.0)                     |
| 291.89                                              | Other alcohol-induced mental disorders, No. (%)                  | 6(0.13)                    |
| 291.9                                               | Unspecified alcohol-induced mental disorders, No. (%)            | 2(0.04)                    |
| 291.0                                               | Alcohol withdrawal delirium, No. (%)                             | 379(8.0)                   |
| 291.1                                               | Alcohol-induced persisting amnesic disorder, No. (%)             | 15(0.32)                   |
| 291.2                                               | Alcohol-induced persisting dementia, No. (%)                     | 114(2.4)                   |
| 291.3                                               | Alcohol-induced psychotic disorder with hallucinations, No. (%)  | 5(0.11)                    |
| 291.5                                               | Alcohol-induced psychotic disorder with delusions, No. (%)       | 2(0.04)                    |

**eTable 3.** Hospital Characteristics of Patients, by Absence or Presence of Alcohol Use Disorders

| <b>Factor</b>        | <b>No AUD<br/>(N=132,744)</b> | <b>AUD<br/>(N=4,752)</b> | <b>P Value<sup>a</sup></b> |
|----------------------|-------------------------------|--------------------------|----------------------------|
| Bed size, No. (%)    |                               |                          | <.001                      |
| . < 200 Beds         | 28,172(21.2)                  | 899(18.9)                |                            |
| . 201 - 400 Beds     | 57,248(43.1)                  | 1,830(38.5)              |                            |
| . > 401 Beds         | 47,324(35.7)                  | 2,023(42.6)              |                            |
| Urban/Rural, No. (%) |                               |                          | .35                        |
| . Rural              | 16,012(12.1)                  | 552(11.6)                |                            |
| . Urban              | 116,732(87.9)                 | 4,200(88.4)              |                            |
| Teach, No. (%)       |                               |                          | <.001                      |
| . No                 | 78,997(59.5)                  | 2,580(54.3)              |                            |
| . Yes                | 53,747(40.5)                  | 2,172(45.7)              |                            |
| Region, No. (%)      |                               |                          | .040                       |
| . Midwest            | 33,482(25.2)                  | 1,136(23.9)              |                            |
| . Northeast          | 24,772(18.7)                  | 863(18.2)                |                            |
| . South              | 56,729(42.7)                  | 2,127(44.8)              |                            |
| . West               | 17,761(13.4)                  | 626(13.2)                |                            |

<sup>a</sup>All P values from Pearson's uncorrected chi-square test.

Abbreviations: AUD, alcohol use disorder

**eTable 4.** Pneumonia Etiologies, by Absence or Presence of Alcohol Use Disorder and Alcohol Withdrawal Syndrome

|                                              | <b>Total</b><br>(N=137,496) | <b>Non AUD</b><br>(N=132,744) | <b>Without AWS</b><br>(N=3,747) | <b>AWS</b><br>(N=1,005) | <b>P Value<sup>a</sup></b> |
|----------------------------------------------|-----------------------------|-------------------------------|---------------------------------|-------------------------|----------------------------|
| Positive culture, No. (%)                    | 12,686(9.2)                 | 12,050(9.1)                   | 489(13.1)                       | 147(14.6)               | <.001                      |
| --Resistant to CAP, No. (%)                  | 5,422(42.7)                 | 5,263(43.7)                   | 131(26.8)                       | 28(19.0)                | <.001                      |
| -- <i>Staphylococcus aureus</i> , No. (%)    | 4,118(32.5)                 | 3,929(32.6)                   | 142(29.0)                       | 47(32.0)                | .25                        |
| -- <i>Streptococcus pneumoniae</i> , No. (%) | 3,347(26.4)                 | 3,069(25.5)                   | 209(42.7)                       | 69(46.9)                | <.001                      |
| -- <i>Pseudomonas aeruginosa</i> , No. (%)   | 1,586(12.5)                 | 1,557(12.9)                   | 25(5.1)                         | 4(2.7)                  | <.001                      |
| -- <i>Escherichia coli</i> , No. (%)         | 1,261(9.9)                  | 1,216(10.1)                   | 35(7.2)                         | 10(6.8)                 | .046                       |
| -- <i>Klebsiella pneumoniae</i> , No. (%)    | 914(7.2)                    | 876(7.3)                      | 32(6.5)                         | 6(4.1)                  | .28                        |

<sup>a</sup>All P values from Pearson's uncorrected chi-square test

Abbreviations: AUD, alcohol use disorder; AWS, alcohol withdrawal syndrome; CAP, community acquired pneumonia

**eFigure.** Inclusion/Exclusion Criteria Considered for Patients Included in the Study

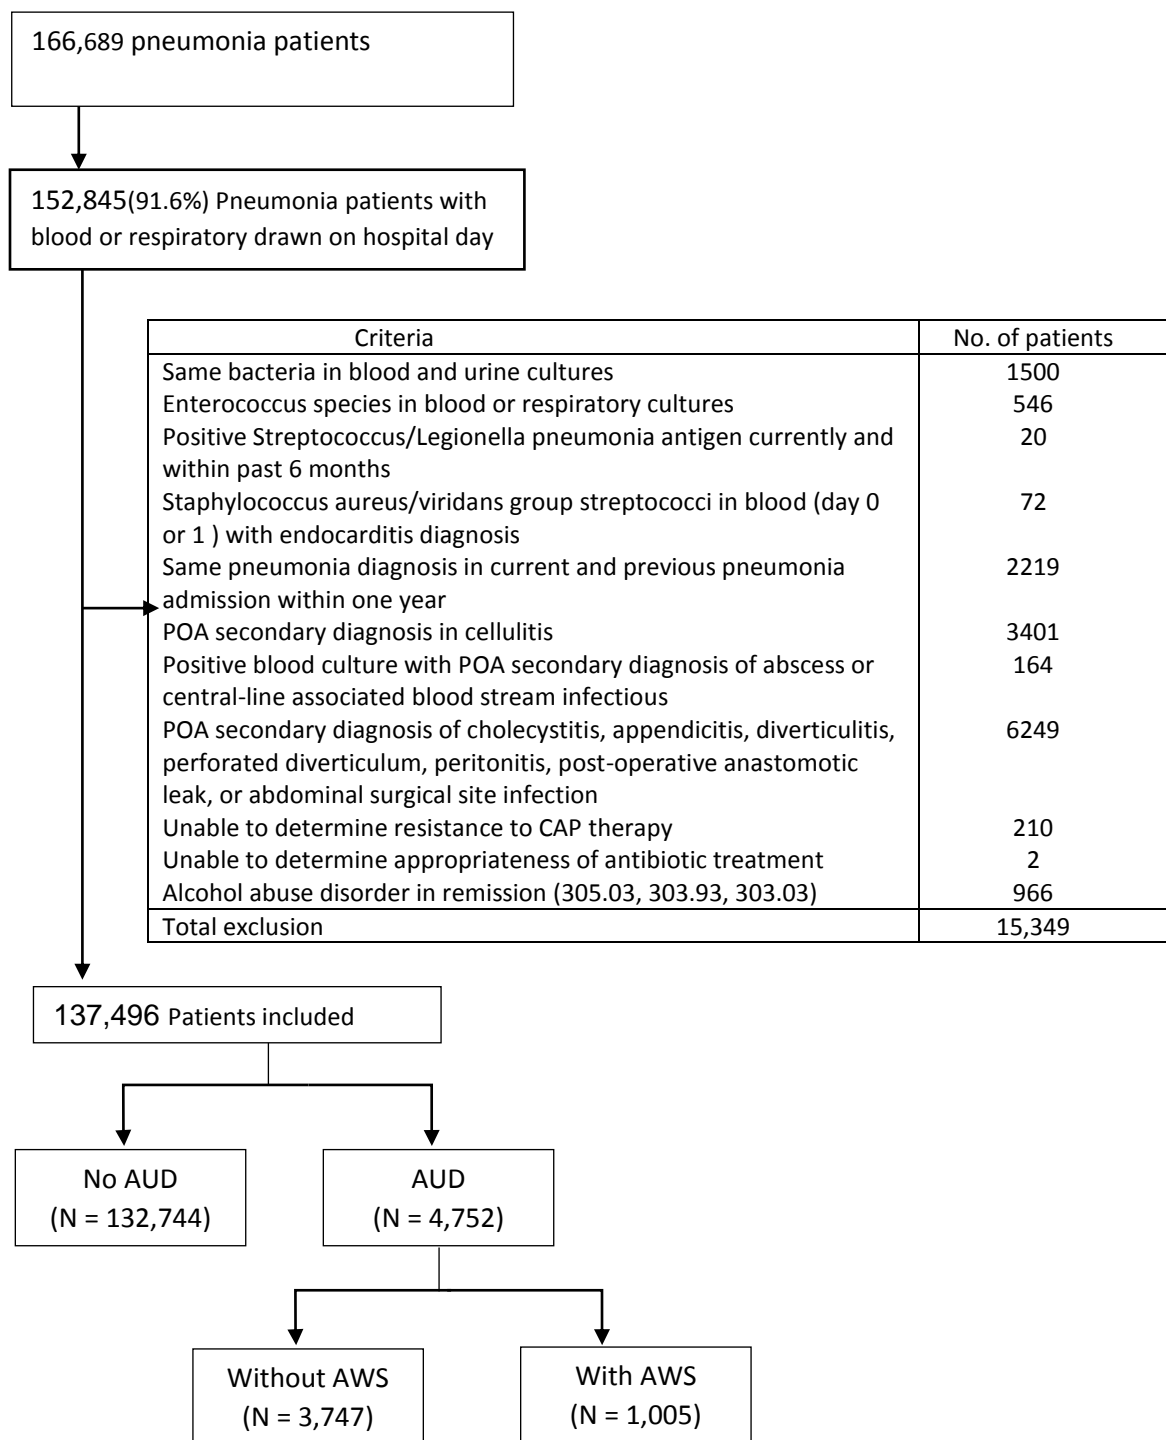

Abbreviations: AUD – Alcohol Use Disorder; AWS – Alcohol Withdrawal Syndrome; POA – Present on Admission; CAP – Community Acquired Pneumonia
